# Supplementary material for: Metal free synthesis of thermally stable blue fluorescent m -terphenyls by ring transformation of 2 H -pyran-2-ones: chemical synthesis, spectroscopy and computational studies
Source: Royal Society of Chemistry journal article supplement (doi:10.1039/d4ra02375g), 2024-01-01
Supplement: d4ra02375g1.pdf [file d4ra02375g1.pdf]

## Supporting Information

### Metal Free Synthesis of Thermally Stable Blue Fluorescent *m*-Terphenyls by Ring Transformation of 2*H*-pyran-2-ones: Chemical Synthesis, Spectroscopy and Computational Studies

5''-(Piperidin-1-yl)-[1,1':4',1'':3'',1''':4''',1''''-quinquephenyl]-4''-carbonitrile 11a:

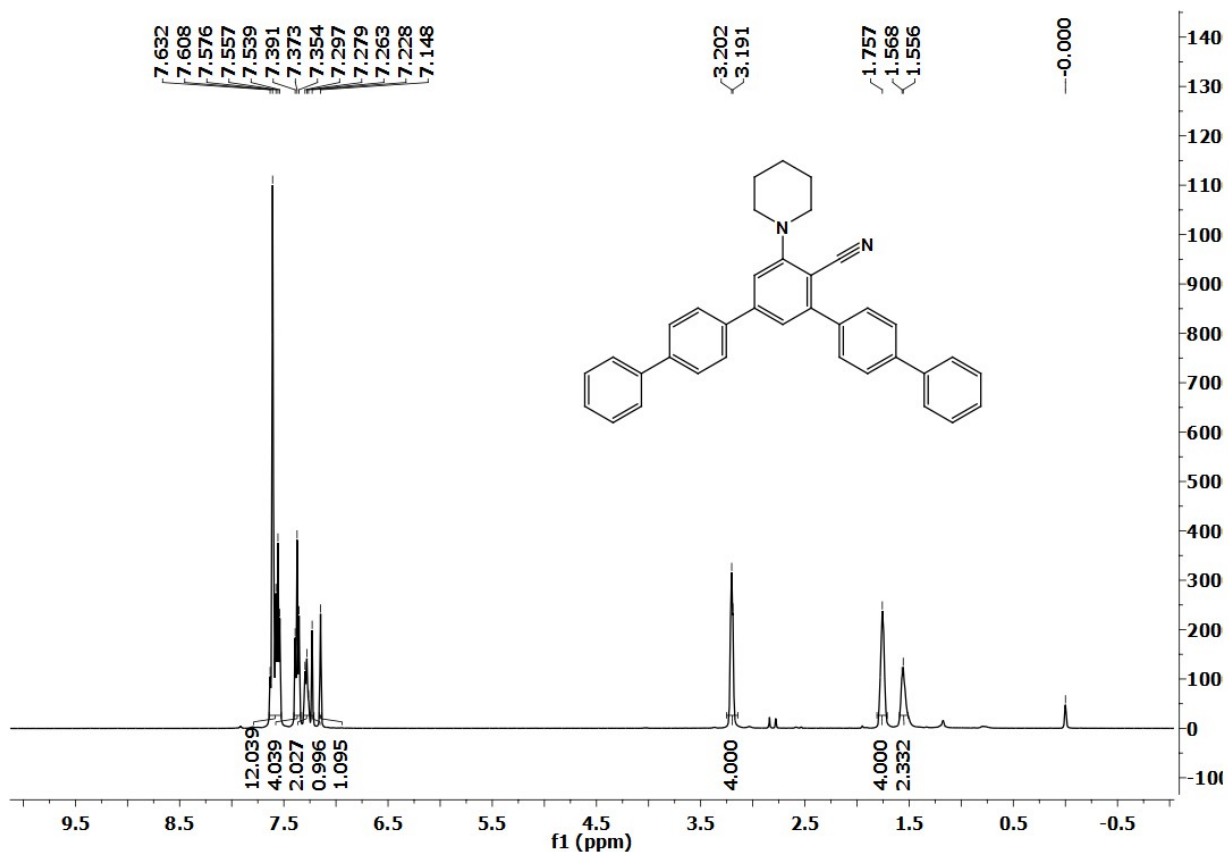



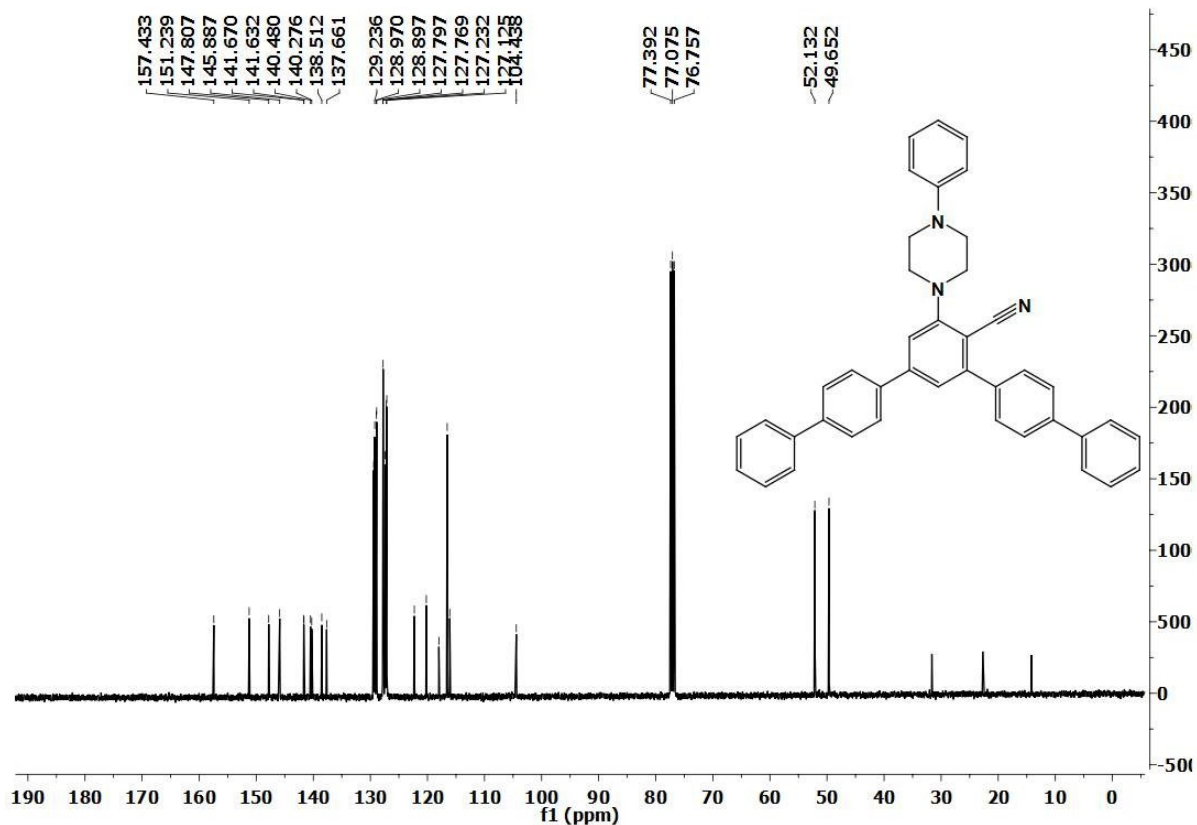

5''-(Pyrrolidin-1-yl)-[1,1':4',1'':3'',1''':4''',1''''-quinquephenyl]-4''-carbonitrile 11c:

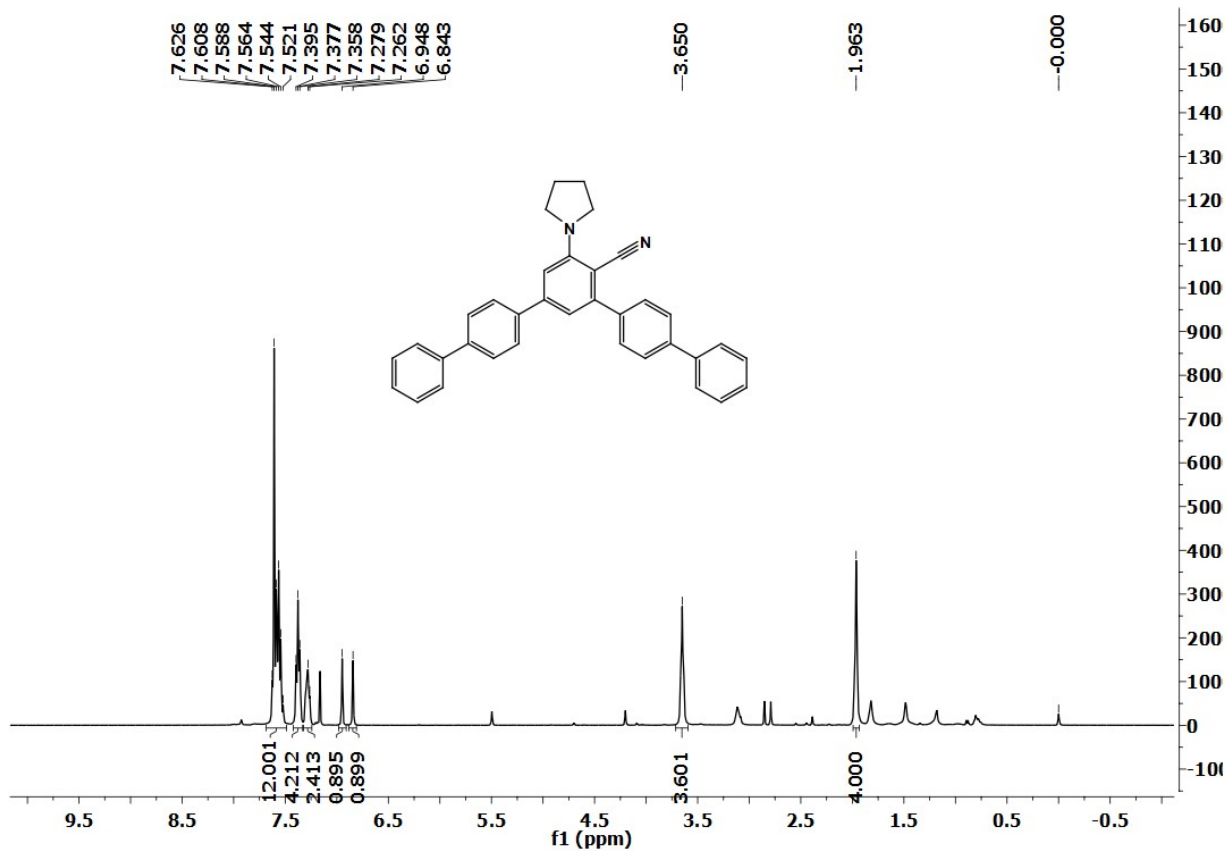

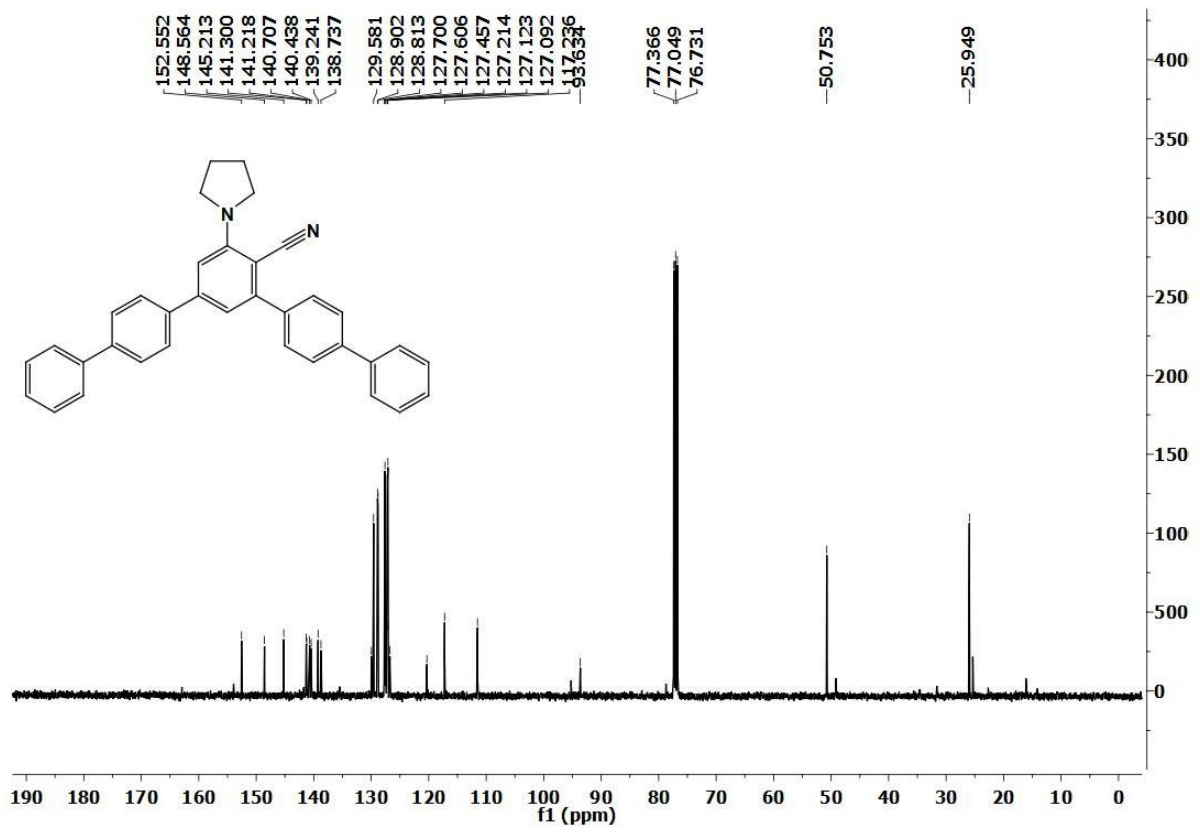

5''-(Diethylamino)-[1,1':4',1'':3'',1''':4''',1''''-quinquephenyl]-4''-carbonitrile 11d:

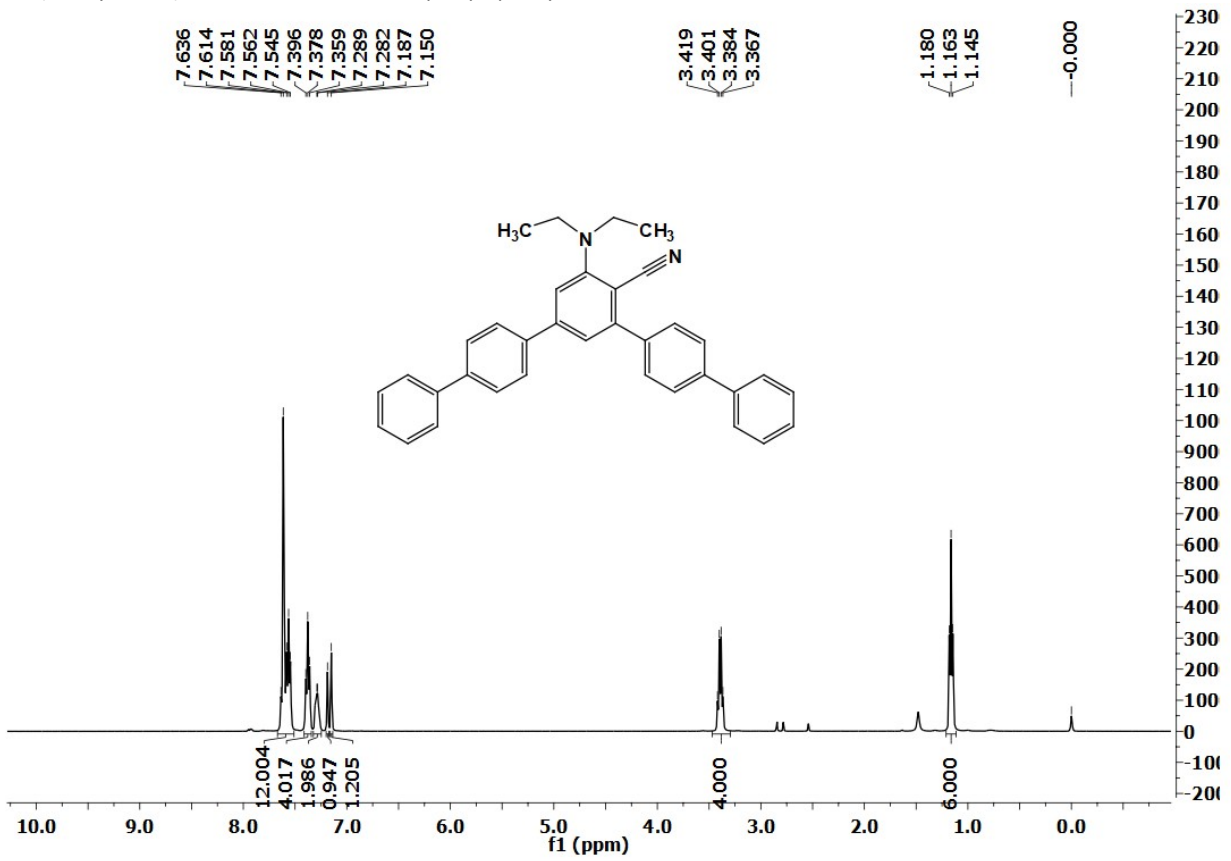

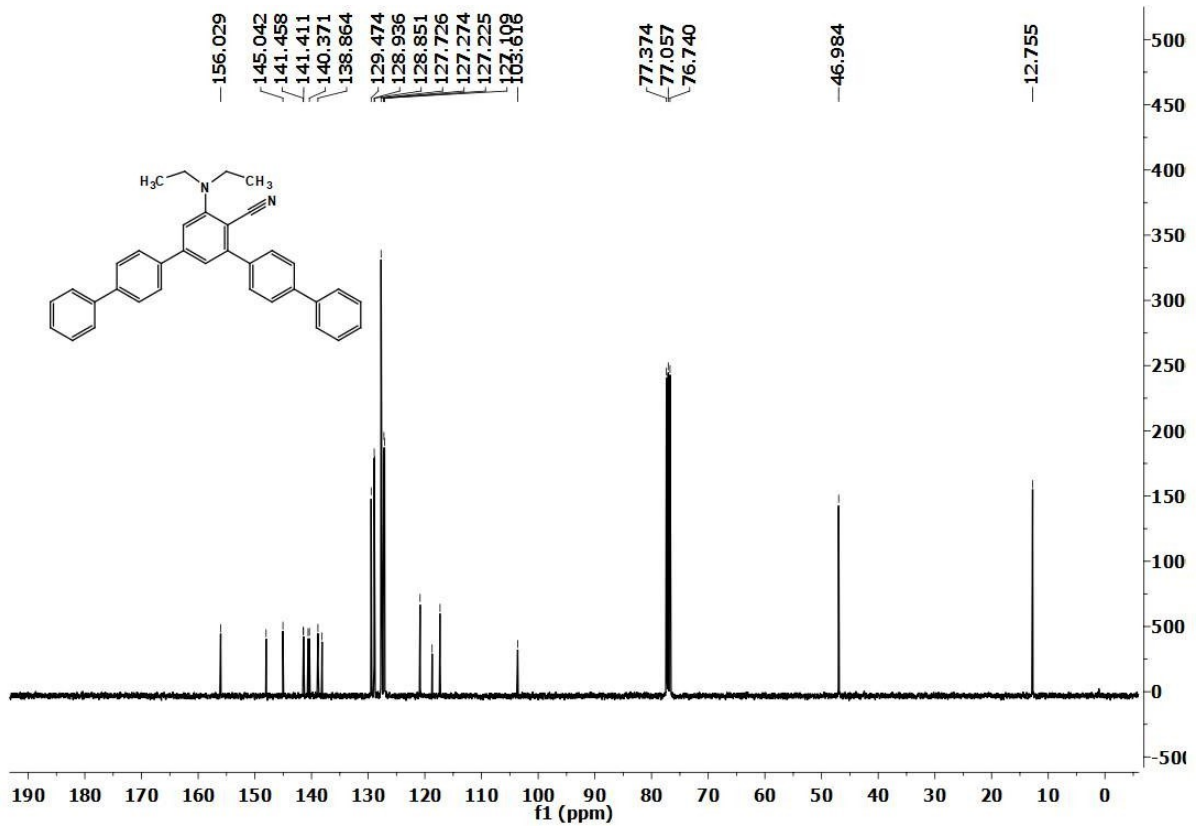

5'-((4-Methylpiperazin-1-yl)-[1,1':4',1'':3'',1'''':4''',1''''-quinquephenyl]-4''-carbonitrile 11e:

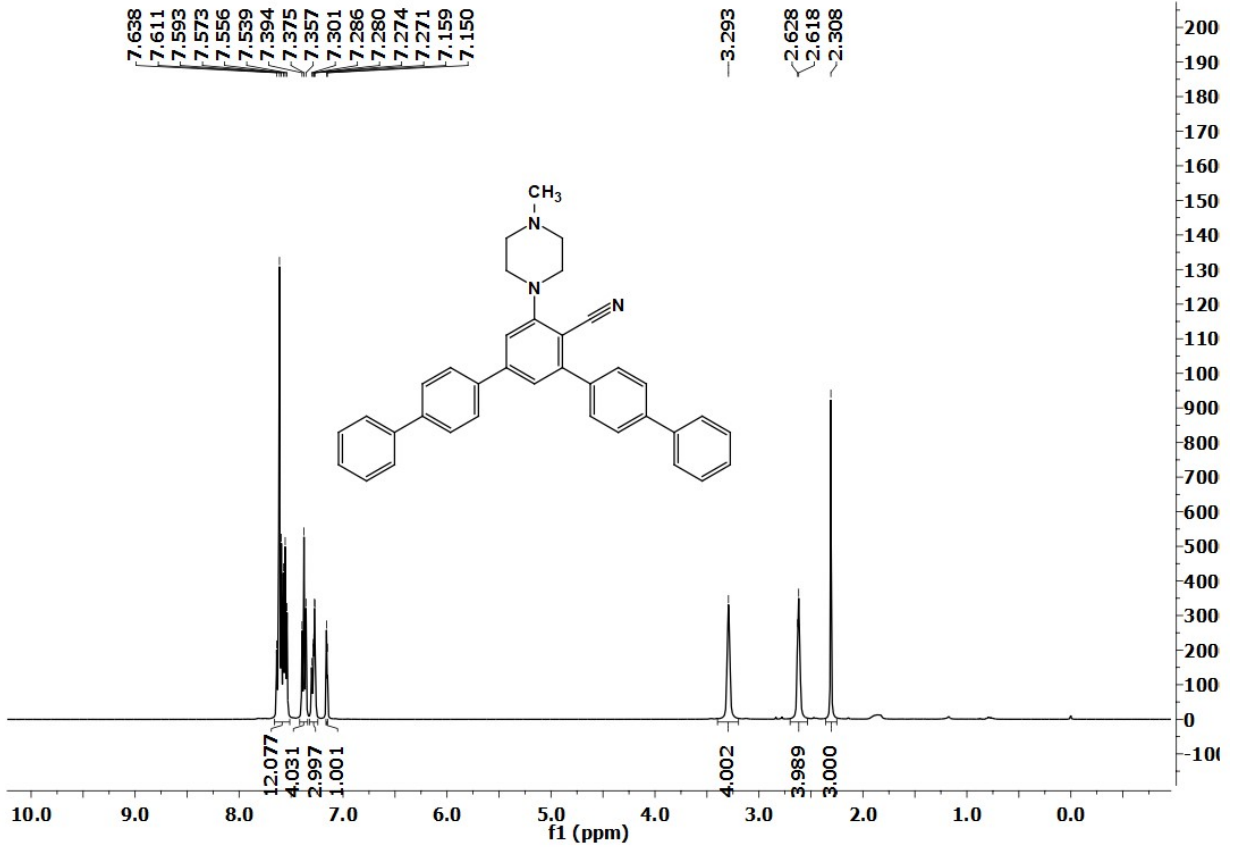

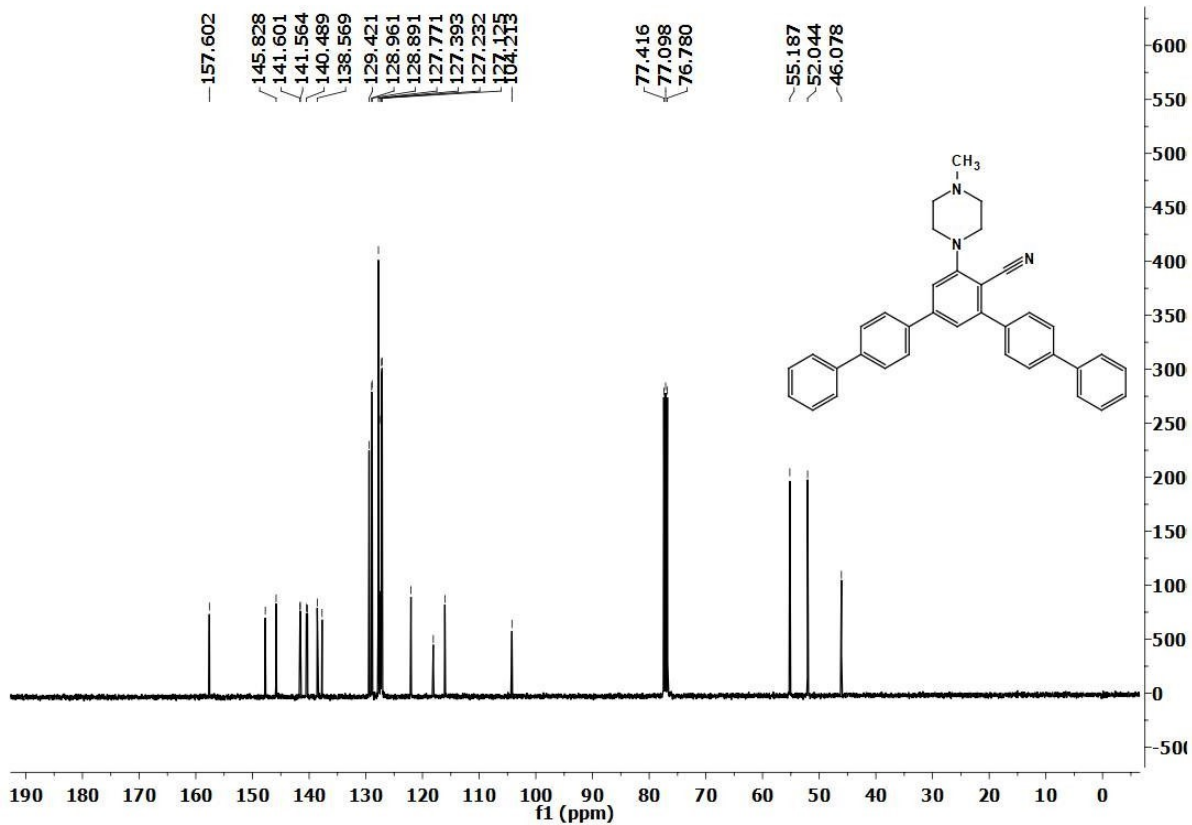

5''-Morpholino-[1,1':4',1'':3'':1'''-quinquephenyl]-4''-carbonitrile 11f:

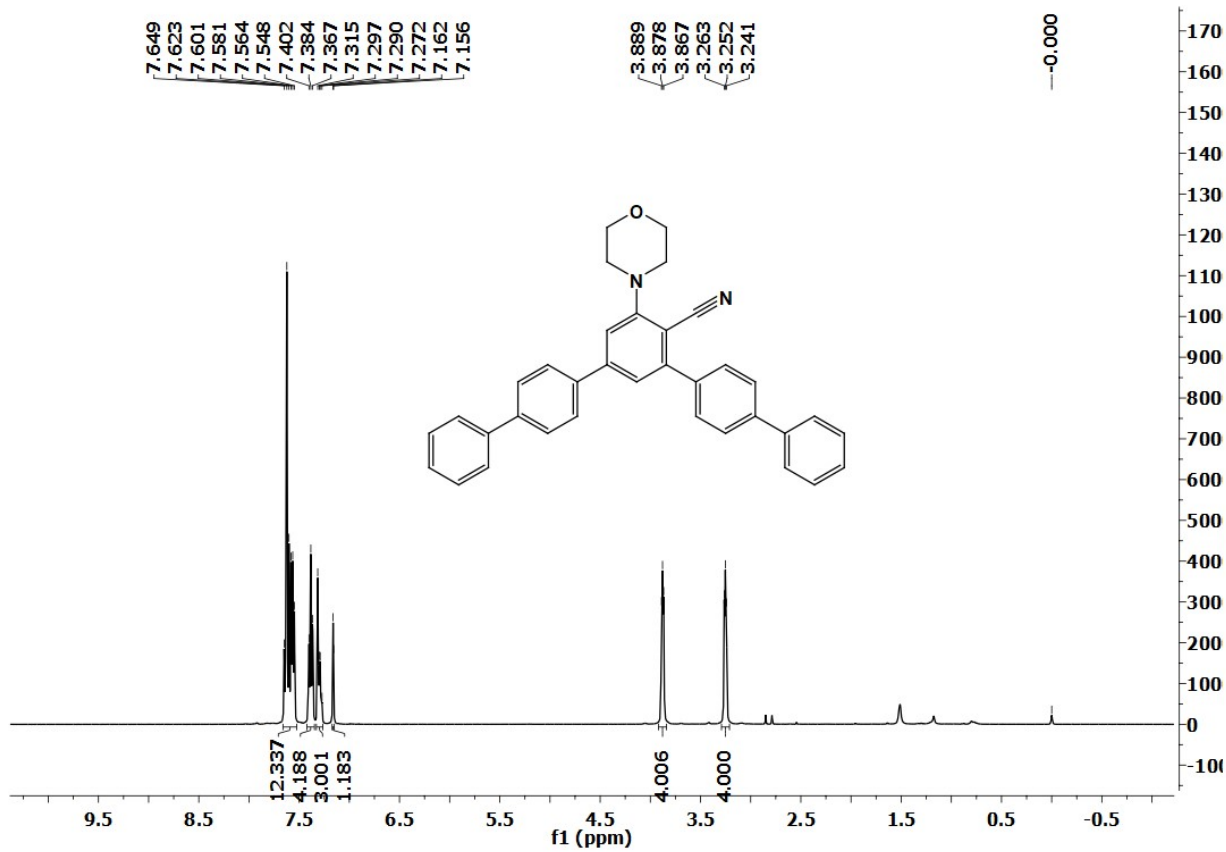

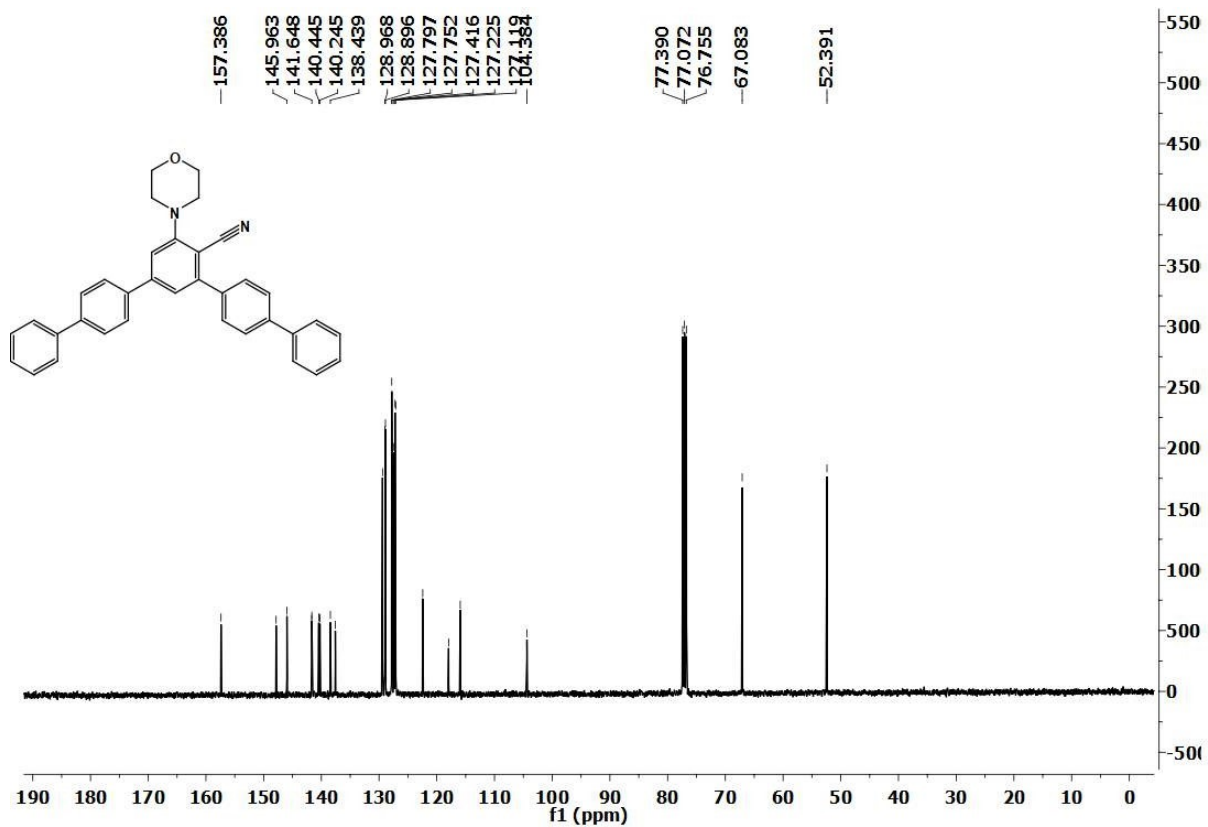

5'-((Dimethylamino)-[1,1':4',1'':3'':1''':4''',1''''-quinquephenyl]-4''-carbonitrile 11g:

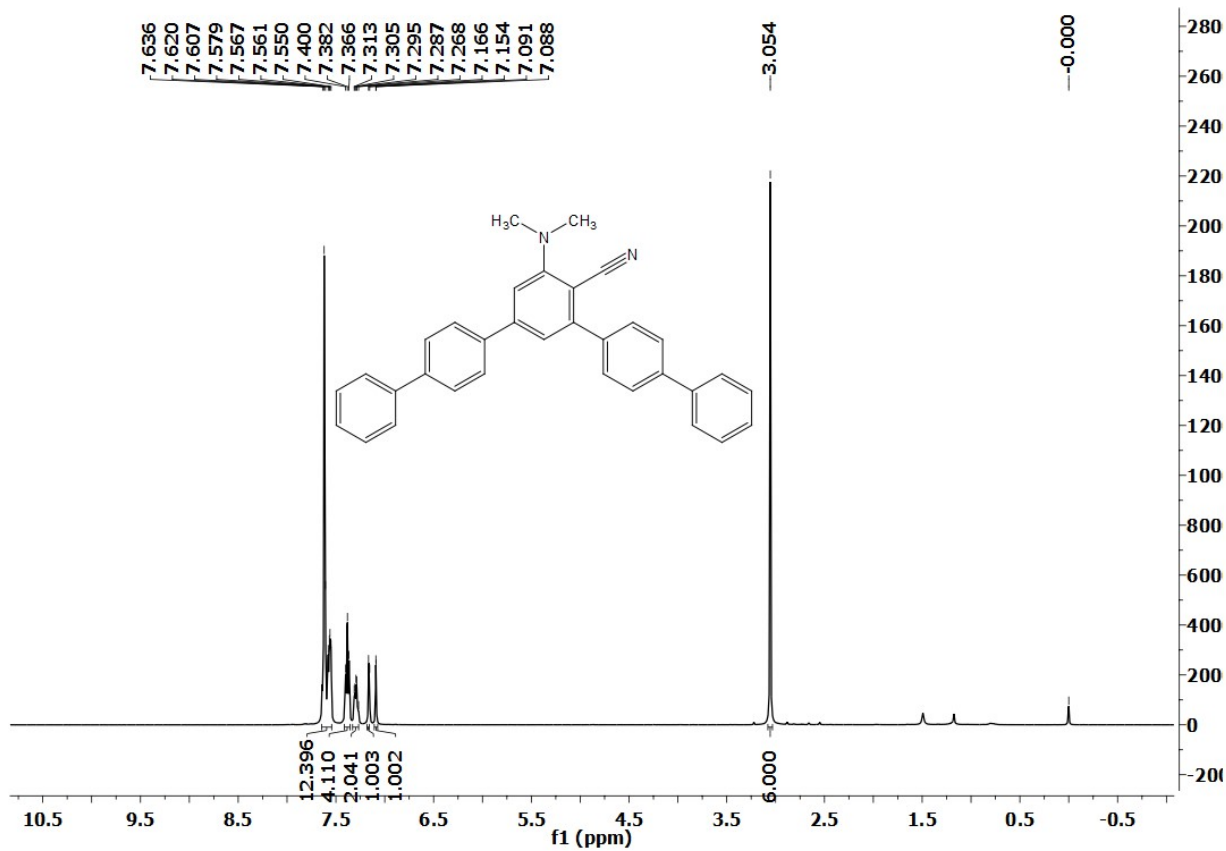



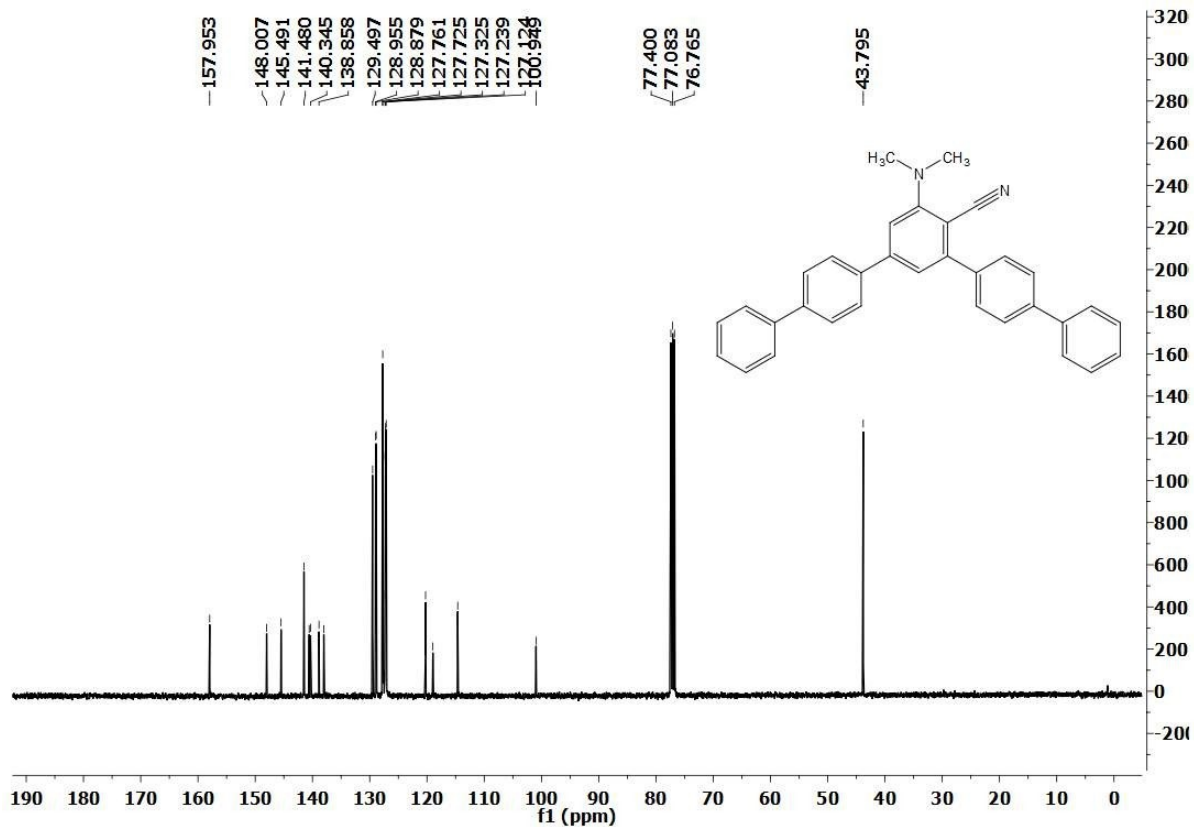

5'-((4-Ethylpiperazin-1-yl)-[1,1':4',1'':3'',1''':4''',1''':4''']-quinquephenyl)-4'-carbonitrile 11h:

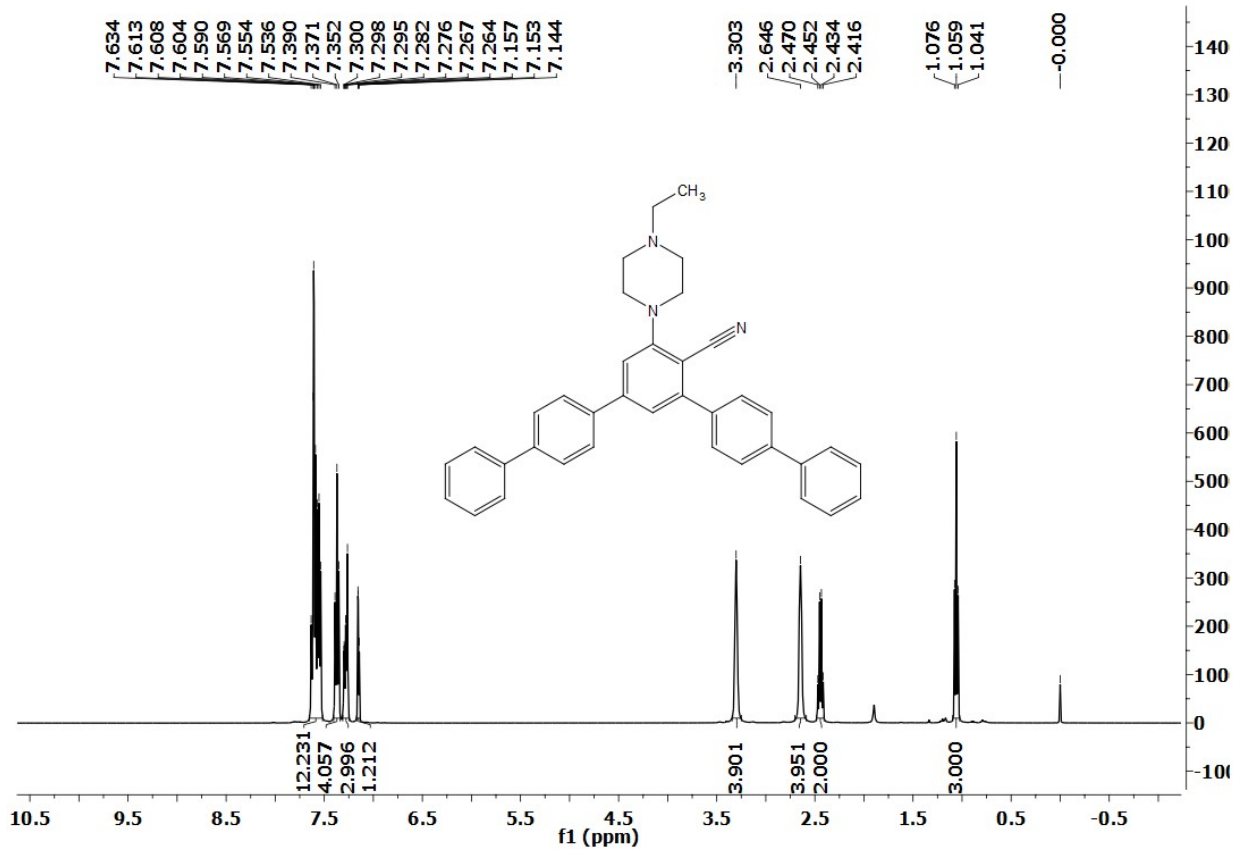



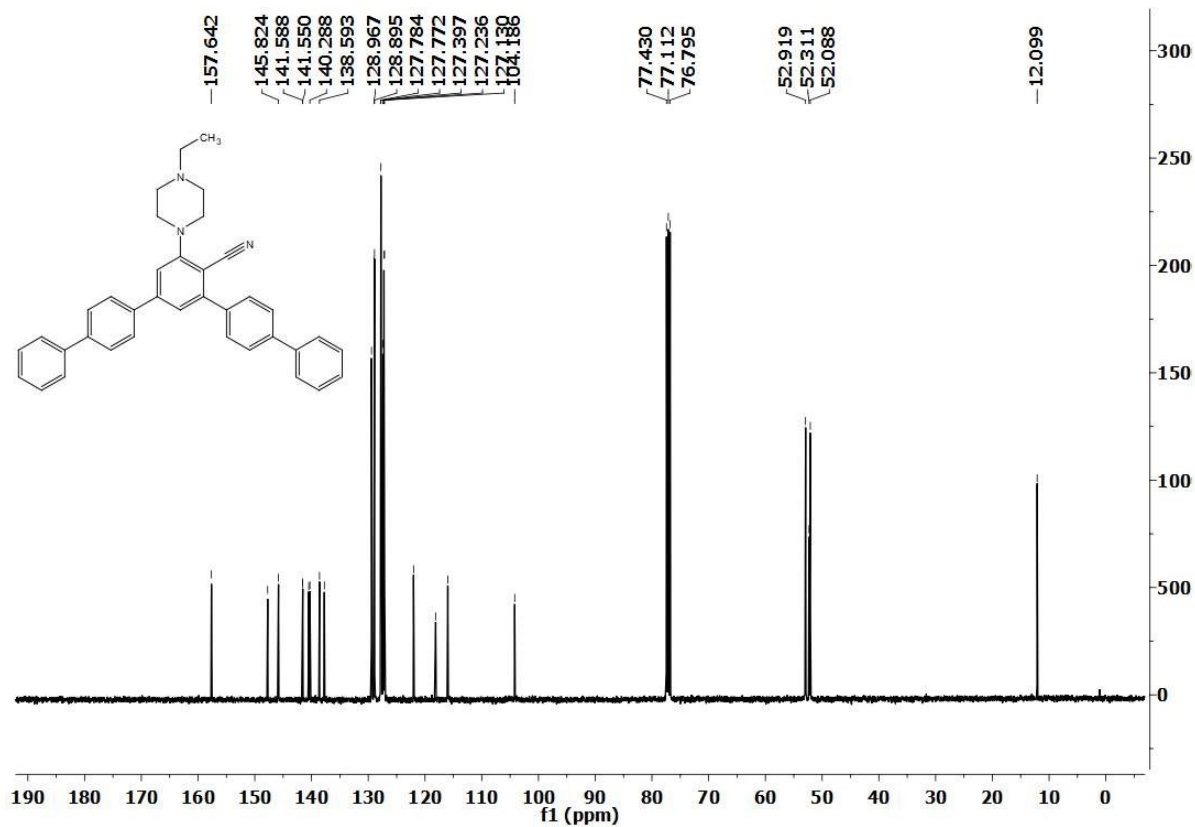

5''-(Piperidin-1-yl)-[1,1':4',1'':3'',1''':4''',1''''-quinquephenyl]-4''-carbonitrile 11a:

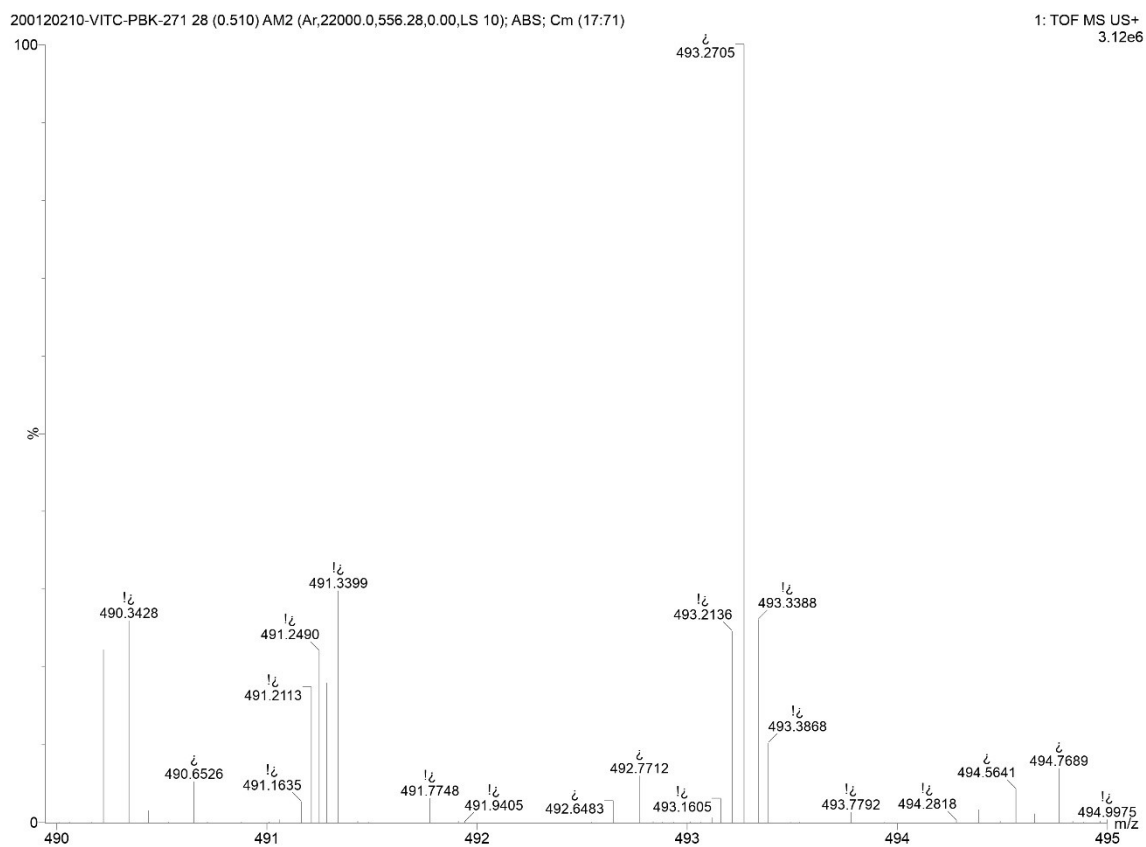

5''-(4-Phenylpiperazin-1-yl)-[1,1':4',1'':3'',1''':4''',1''''-quinquephenyl]-4''-carbonitrile 11b:

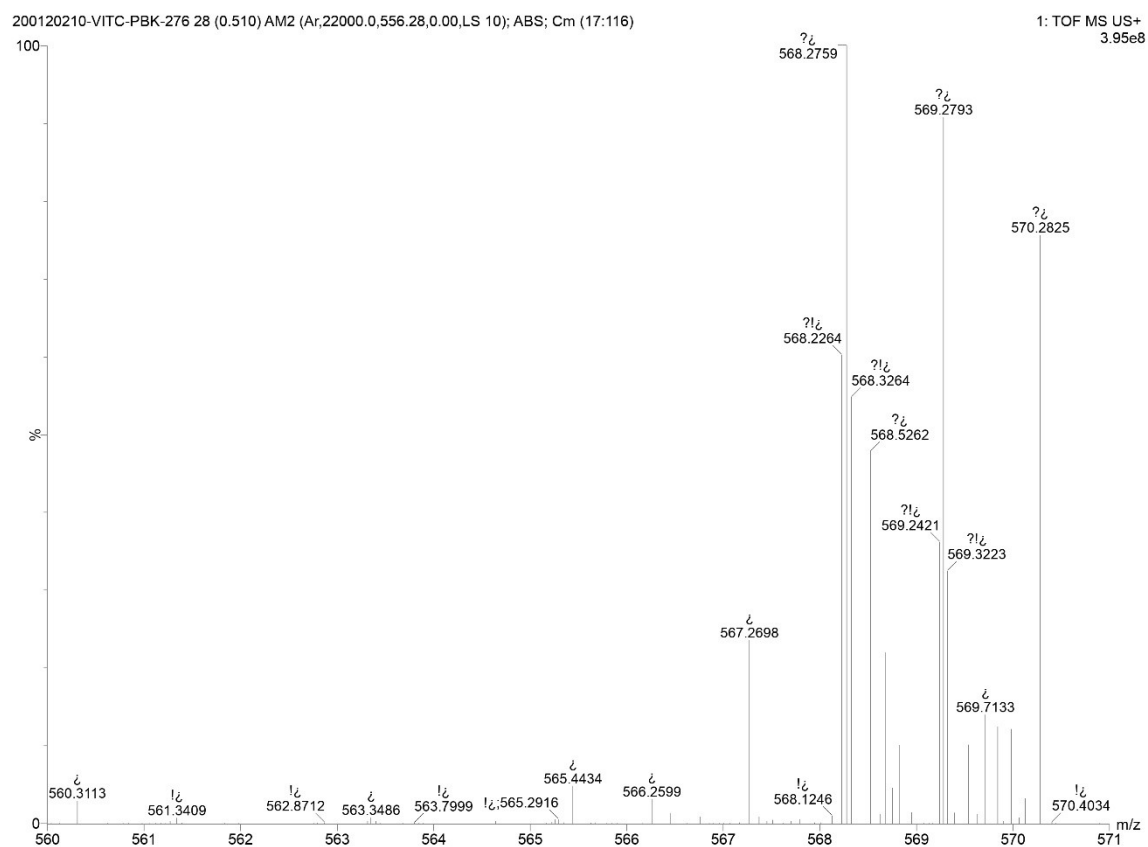

**5''-Morpholino-[1,1':4',1'':3'',1''':4''',1''''-quinquephenyl]-4''-carbonitrile 11f:**

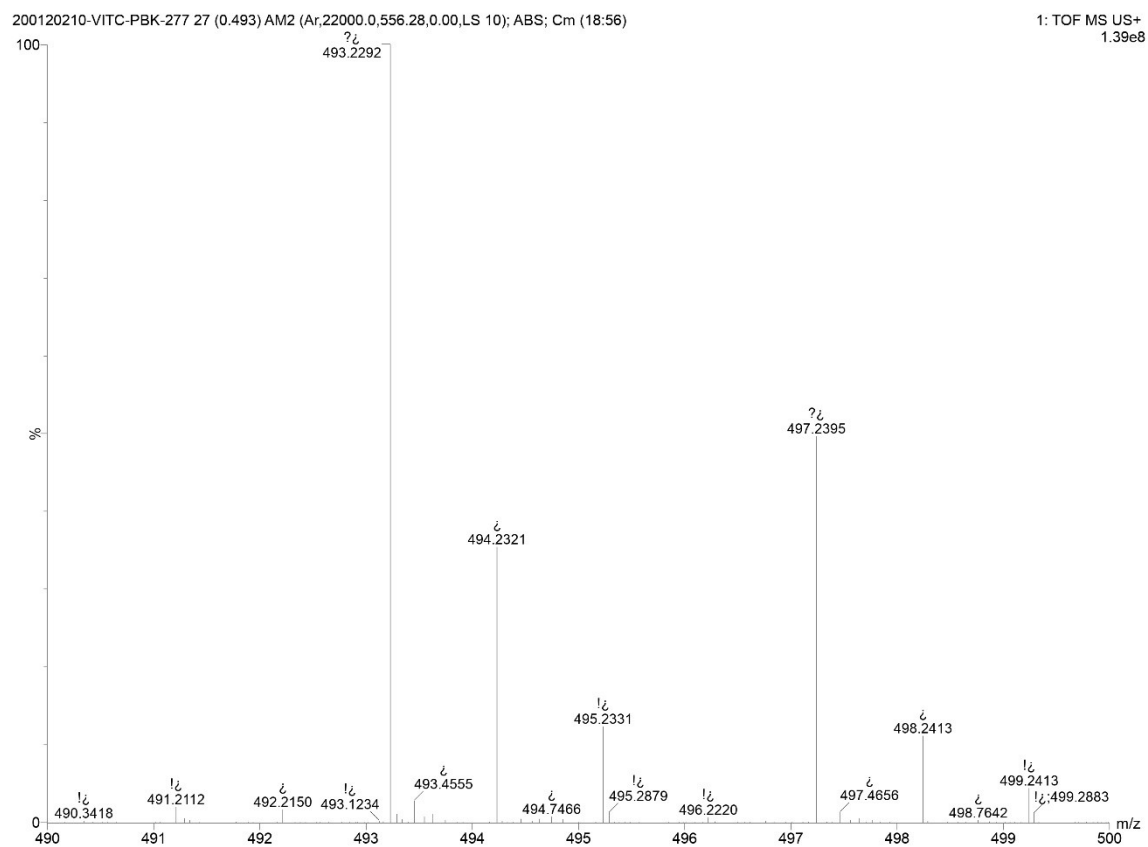

**Figure S1:** <sup>1</sup>H-NMR, <sup>13</sup>C-NMR and mass spectra of the synthesized molecules.

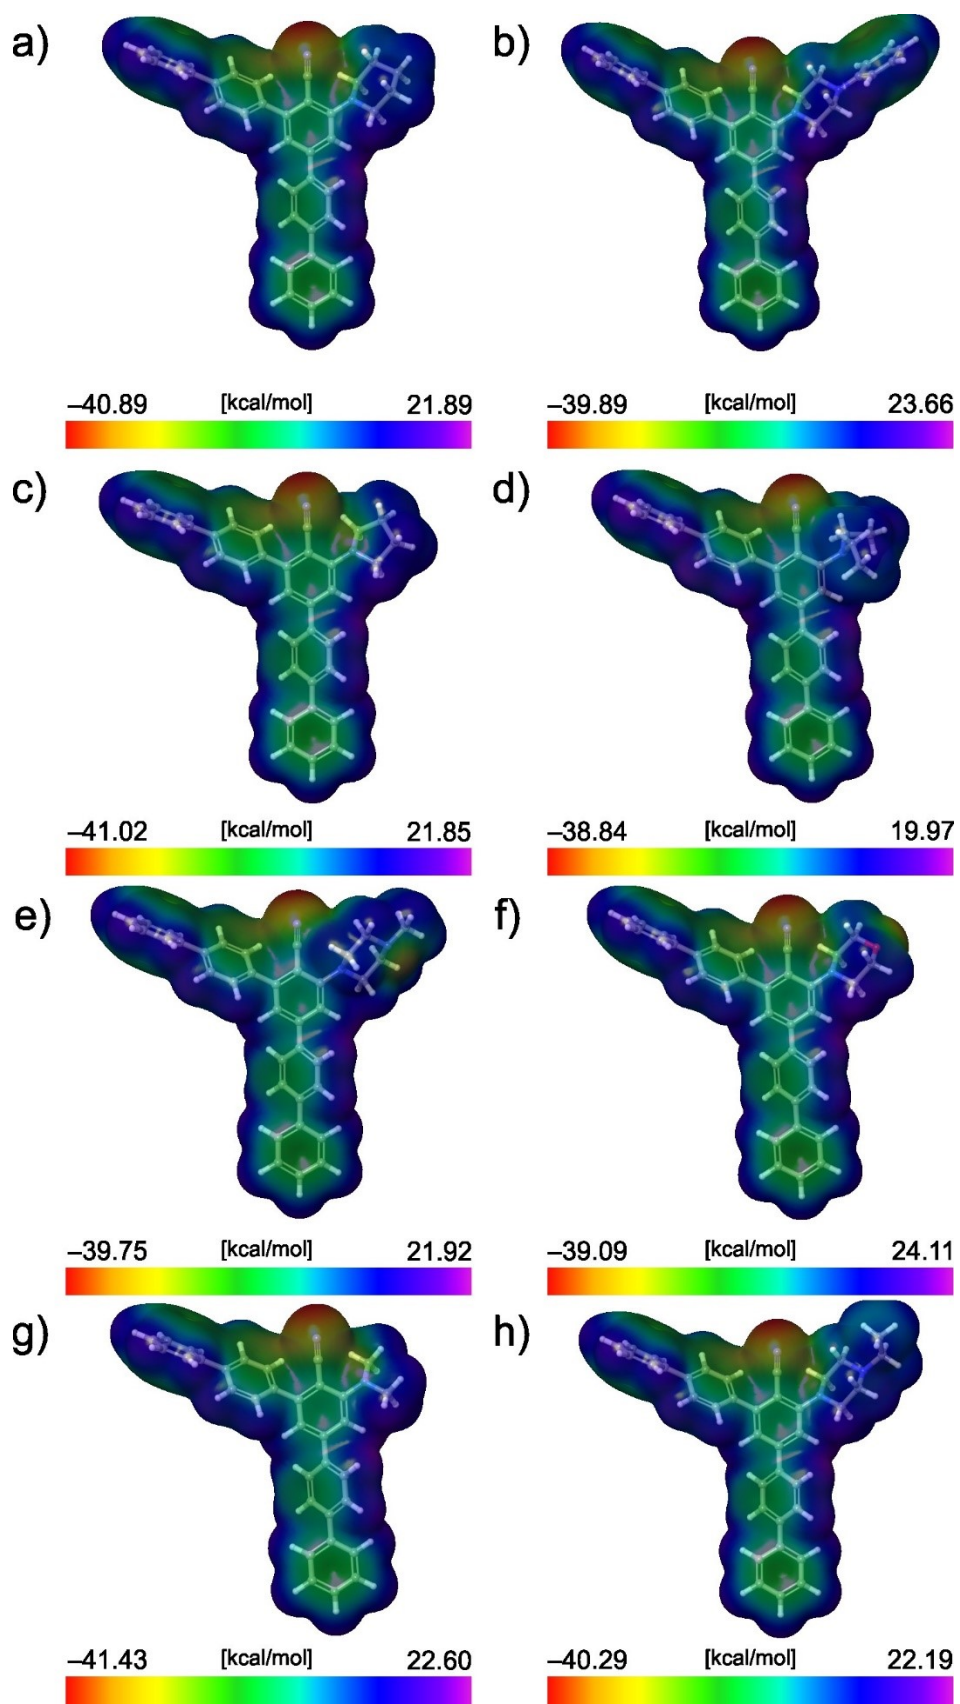

Figure S2: MEP surfaces of 11a-h molecules.

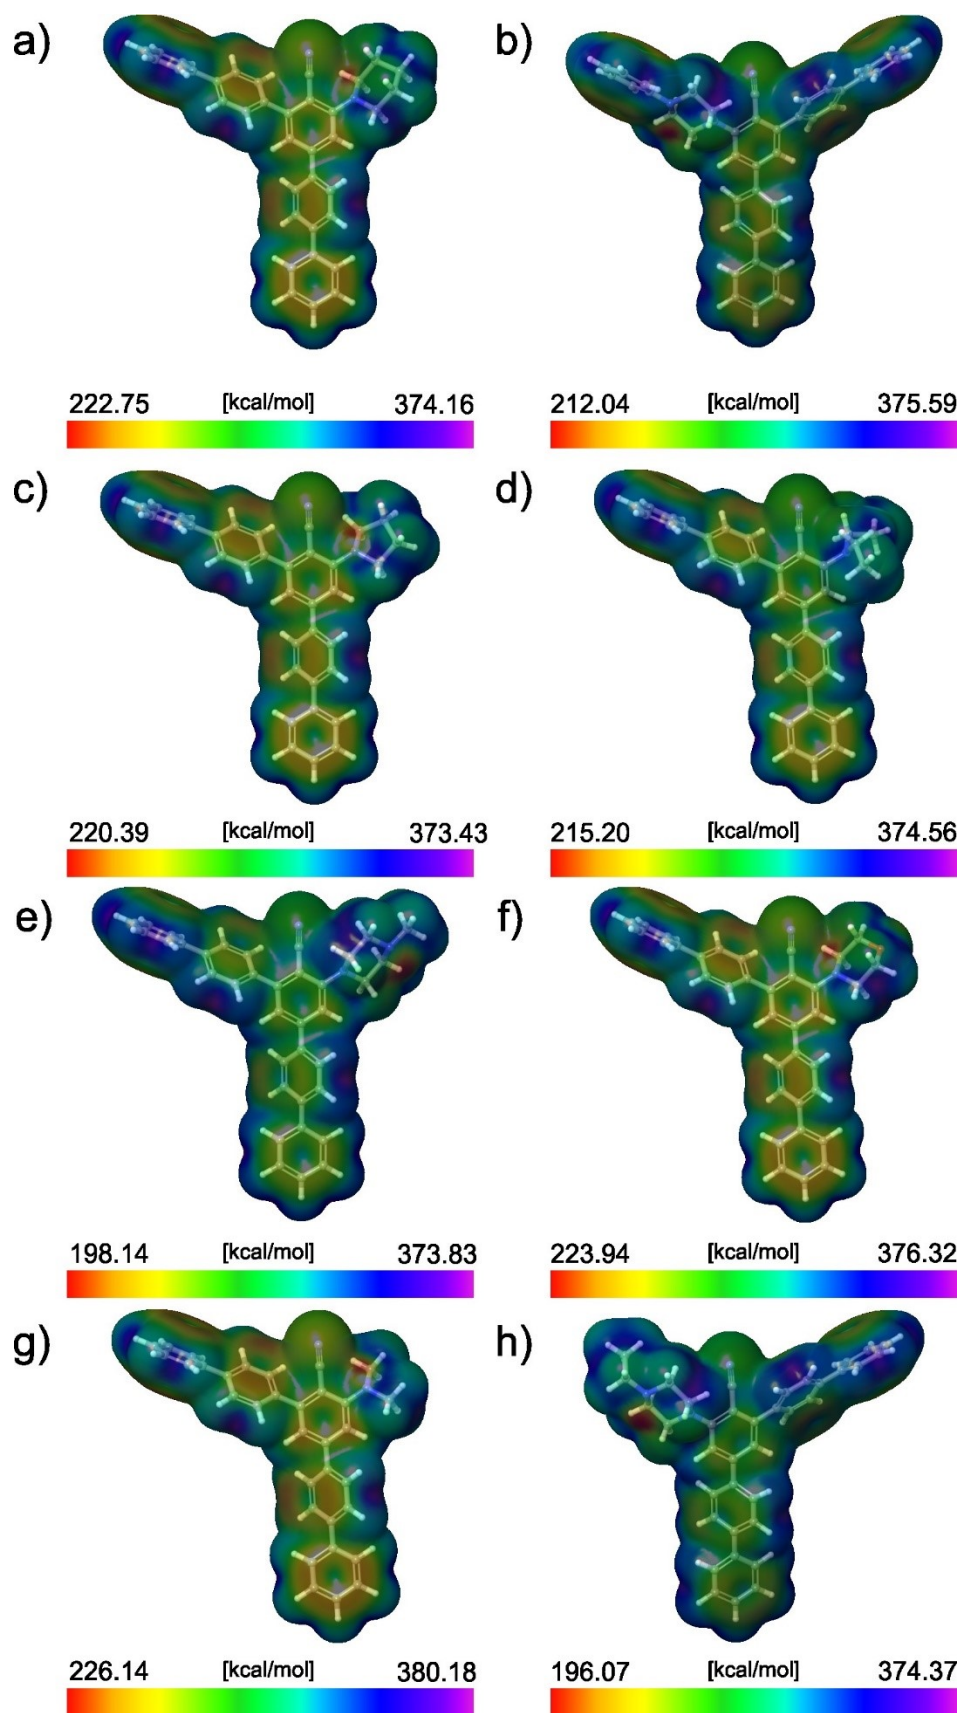

Figure S3: ALIE values of 11a-h molecules.

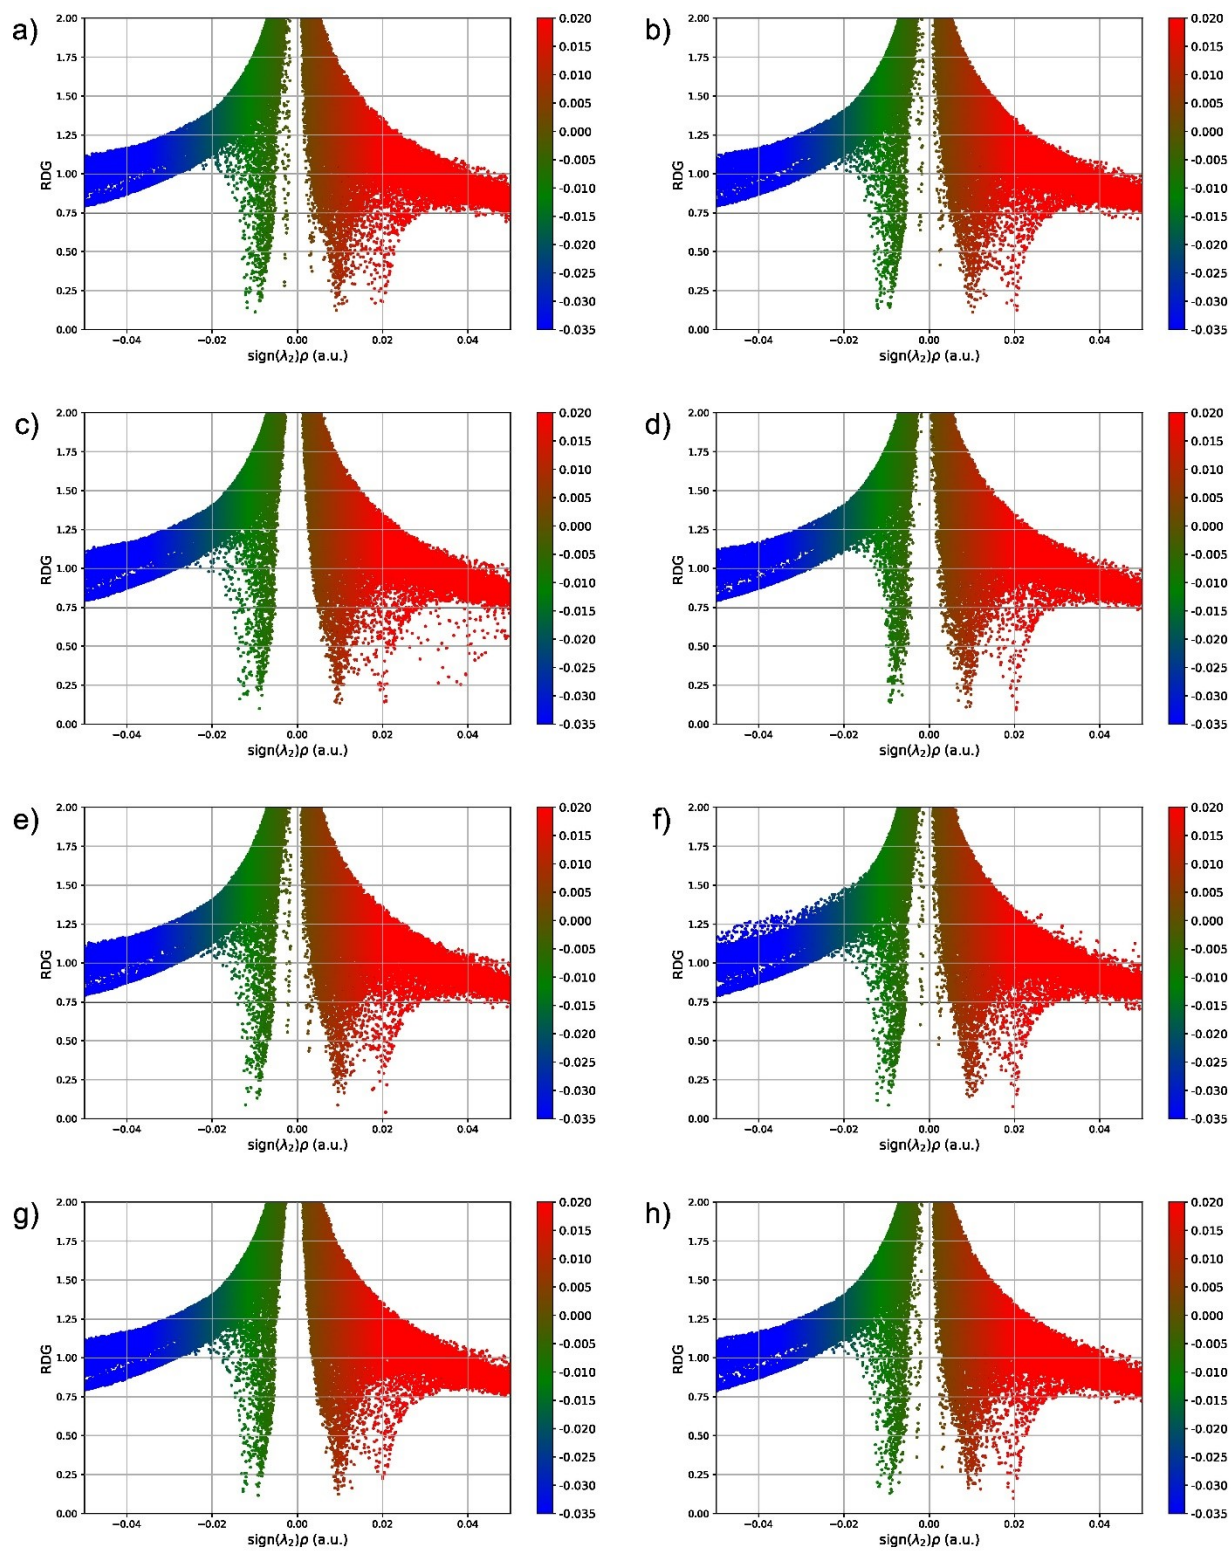

Figure S4. RDG scatter plots of 11a-h molecules.



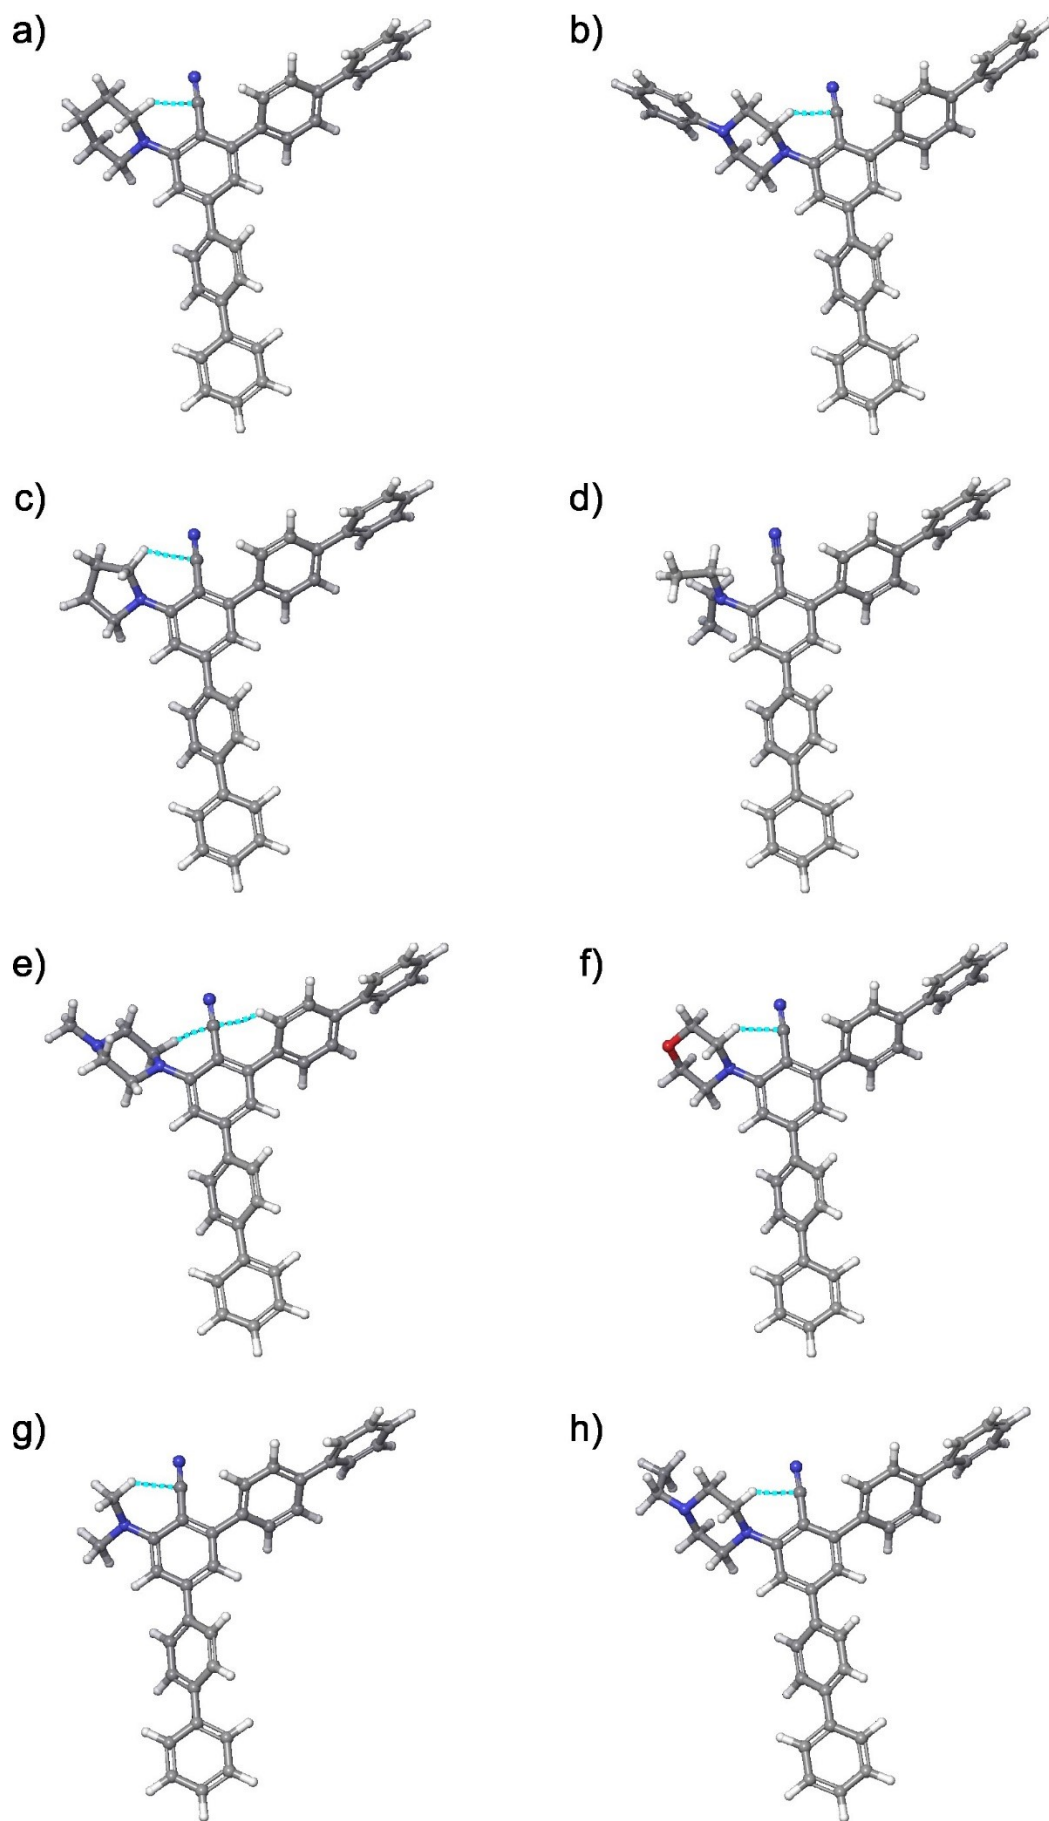

**Figure S5.** RDG surfaces and non-covalent interactions with numerated non-covalent interactions. Orange lines indicate non-covalent interactions identified by critical points.
